# Incidence and Predictors of Difficult and Impossible Mask Ventilation

Sachin Kheterpal, M.D., M.B.A.,\* Richard Han, M.D., M.P.H.,\* Kevin K. Tremper, Ph.D., M.D.,† Amy Shanks, M.S.,‡ Alan R. Tait, Ph.D.,§ Michael O'Reilly, M.D., M.S.,|| Thomas A. Ludwig, M.D., M.S.\*

**Background:** Mask ventilation is an essential element of airway management that has rarely been studied as the primary outcome. The authors sought to determine the incidence and predictors of difficult and impossible mask ventilation.

**Methods:** A four-point scale to grade difficulty in performing mask ventilation (MV) is used at the authors' institution. They used a prospective, observational study to identify cases of grade 3 MV (inadequate, unstable, or requiring two providers), grade 4 MV (impossible to ventilate), and difficult intubation. Univariate and multivariate analyses of a variety of patient history and physical examination characteristics were used to establish risk factors for grade 3 and 4 MV.

**Results:** During a 24-month period, 22,660 attempts at MV were recorded. 313 cases (1.4%) of grade 3 MV, 37 cases (0.16%) of grade 4 MV, and 84 cases (0.37%) of grade 3 or 4 MV and difficult intubation were observed. Body mass index of 30 kg/m<sup>2</sup> or greater, a beard, Mallampati classification III or IV, age of 57 yr or older, severely limited jaw protrusion, and snoring were identified as independent predictors for grade 3 MV. Snoring and thyromental distance of less than 6 cm were independent predictors for grade 4 MV. Limited or severely limited mandibular protrusion, abnormal neck anatomy, sleep apnea, snoring, and body mass index of 30 kg/m<sup>2</sup> or greater were independent predictors of grade 3 or 4 MV and difficult intubation.

**Conclusions:** The authors observed the incidence of grade 3 MV to be 1.4%, similar to studies with the same definition of difficult MV. Presence of a beard is the only easily modifiable independent risk factor for difficult MV. The mandibular protrusion test may be an essential element of the airway examination.

MASK ventilation (MV) is an essential component of airway management and the delivery of general anesthesia.<sup>1</sup> Successful MV provides anesthesia practitioners with a rescue technique during unsuccessful attempts at laryngoscopy and unanticipated difficult airway situations. Although there is an extensive body of literature addressing predictive factors for difficult laryngoscopy

and grading its view, investigations that focus on MV are limited.<sup>2,3</sup>

In 2000, Langeron *et al.*<sup>4</sup> characterized predictive factors for and incidence of difficult mask ventilation (DMV). In an accompanying editorial, Adnet<sup>3</sup> recommended establishing a MV numerical scale. In 2004, Han *et al.*<sup>5</sup> described a grading scale for MV consisting of four categories (grades 1-4), with grade 3 and 4 describing specific criteria for DMV and impossible mask ventilation (IMV), respectively.

Given the limited data regarding DMV and almost complete absence of data regarding IMV, the objectives of the current study included a confirmation of Langeron's predictive factors for DMV, evaluation of associations between previously unstudied parameters and DMV, determination of the incidence of both DMV and IMV, and evaluation of final airway outcome in cases of IMV.

## Materials and Methods

After obtaining institutional review board approval (University of Michigan, Ann Arbor, Michigan), all adult patients undergoing general anesthesia were prospectively included in this trial. Because no clinical interventions were studied and no patient-identifiable data were used, signed patient informed consent was waived per the institutional review board approval. For each anesthetic case, a preoperative history and physical and intraoperative record were documented using an electronic perioperative clinical information system (Centricity<sup>®</sup>; General Electric Healthcare, Waukesha, WI). Elements documented included a standard airway physical examination, physical features that may affect mask fit, patient history that may suggest airway anatomy pathology, and general patient and operation characteristics (tables 1 and 2).<sup>6,7</sup>

The primary outcome measure was ease or difficulty of MV. A four-point scale ranging from grade 1 to 4 originally described by Han *et al.*<sup>5</sup> is used at our facility (table 3). Grade 3 (DMV) is defined as MV that is inadequate to maintain oxygenation, unstable MV, or MV requiring two providers. Grade 4 MV is defined as IMV noted by absence of end-tidal carbon dioxide measurement and lack of perceptible chest wall movement during positive-pressure ventilation attempts despite airway adjuvants and additional personnel. Two incidence pilot studies were previously performed by Han *et al.*<sup>5</sup> Previous studies suggest that the use of muscle relaxant does not alter the grade MV assigned.<sup>4,8</sup> Secondary outcomes mea-

This article is accompanied by an Editorial View. Please see: Yentis SM: Predicting trouble in airway management. ANESTHESIOLOGY 2006; 105:871-2.

\* Resident, † Robert B. Sweet Professor and Chair, ‡ Research Associate, § Professor, || Associate Professor.

Received from the Department of Anesthesiology, University of Michigan Medical School, Ann Arbor, Michigan. Submitted for publication October 28, 2005. Accepted for publication June 7, 2006. Support was provided solely from institutional and/or departmental sources. Preliminary data from this article were presented in poster/abstract form at the Annual Meeting of the American Society of Anesthesiologists, Atlanta, Georgia, October 25, 2005.

Address correspondence to Dr. Kheterpal: 1H247 University Hospital Box 0048, 1500 East Medical Center Drive, Ann Arbor, Michigan 48103. sachinkh@med.umich.edu. Individual article reprints may be purchased through the Journal Web site, www.anesthesiology.org.

**Table 1. Airway Physical Examination and History Elements**

|                                                                                                                                                                                                                                                               |
|---------------------------------------------------------------------------------------------------------------------------------------------------------------------------------------------------------------------------------------------------------------|
| Cervical spine (limited extension, limited flexion, known unstable, possible unstable)                                                                                                                                                                        |
| Neck anatomy (limited laryngeal mobility, mass, radiation changes, thick/obese, thyroid cartilage not visible, tracheal deviation)                                                                                                                            |
| Thyroid cartilage to mentum distance (< 6 cm, ≥ 6 cm)                                                                                                                                                                                                         |
| Mouth opening interincisor or intergingival distance (< 3 cm, ≥ 3 cm)                                                                                                                                                                                         |
| Mandibular protrusion test <sup>6</sup> (normal: lower incisors can be protruded anterior to upper incisors; limited: lower incisors can be advanced to only meet upper incisors; severely limited: lower incisors cannot be advanced to meet upper incisors) |
| Mallampati classification (I, II, III, or IV) as modified by Samssoon and Young, <sup>7</sup> performed with patient sitting with head in neutral flexion/extension position, tongue out, without phonation                                                   |
| Full beard (yes, no, moustache, or goatee)                                                                                                                                                                                                                    |
| Dentition (normal, dentures upper partial, dentures upper complete, dentures lower partial, dentures lower complete, edentulous, teeth missing/loose/broken)                                                                                                  |
| History of cough (chronic, recent, productive, nonproductive)                                                                                                                                                                                                 |
| History of rhinorrhea                                                                                                                                                                                                                                         |
| History of chronic obstructive pulmonary disease (chronic bronchitis or emphysema requiring treatment with inhaled or systemic steroids or bronchodilators)                                                                                                   |
| History of asthma (requiring treatment with inhaled or systemic steroids or bronchodilators)                                                                                                                                                                  |
| History of snoring occurring nightly                                                                                                                                                                                                                          |
| History of obstructive sleep apnea requiring continuous positive airway pressure, bilevel positive airway pressure, or surgery                                                                                                                                |

sured were direct laryngoscopy (DL) view as defined by Cormack and Lehane,<sup>9</sup> a subjective assessment of difficult intubation (DI) due to more than three attempts by anesthesia attending staff, and the ability to perform successful tracheal intubation using DL. These data were collected using standardized pick-list choices with the option of free text entry if the choices did not offer the anesthesiologist the ability to fully document the clinical observation.

Anesthesia services were provided by anesthesiology attending staff with assistance from certified registered nurse anesthetists, anesthesia residents, and fellows in training. In general, both MV and intubation were attempted initially by the anesthesiology resident or certified registered nurse anesthetists present in the room. All clinical decisions regarding airway management (patient position, DL blade, use of thyroid pressure) were made by the attending staff. The attending could choose to perform an awake fiberoptic intubation at their discretion, thereby avoiding a MV attempt. MV was performed without a harness using a black rubber reusable mask (Rüsch; Teleflex Medical Inc., Research Triangle Park, NC) or clear disposable plastic mask (King Systems Cor-

**Table 2. General Patient and Operation Characteristics**

|                                                                                                                                                                  |
|------------------------------------------------------------------------------------------------------------------------------------------------------------------|
| Body mass index [weight in kilograms/(height in meters) <sup>2</sup> ]                                                                                           |
| Patient age in years at time of procedure                                                                                                                        |
| American Society of Anesthesiologists physical status (I–VI, E denoting emergency)                                                                               |
| Emergent surgical procedure (yes/no)                                                                                                                             |
| Operation planned                                                                                                                                                |
| Operative surgical service                                                                                                                                       |
| Experience level of anesthetist (intern, clinical anesthesia-1, clinical anesthesia-2, clinical anesthesia-3, fellow, or certified registered nurse anesthetist) |

**Table 3. Mask Ventilation Scale and Incidence**

| Grade       | Description                                                                                              | n (%)         |
|-------------|----------------------------------------------------------------------------------------------------------|---------------|
| 1           | Ventilated by mask                                                                                       | 17,535 (77.4) |
| 2           | Ventilated by mask with oral airway/ adjuvant with or without muscle relaxant                            | 4,775 (21.1)  |
| 3           | Difficult ventilation (inadequate, unstable, or requiring two providers) with or without muscle relaxant | 313 (1.4)     |
| 4           | Unable to mask ventilate with or without muscle relaxant                                                 | 37 (0.16)     |
| Total cases |                                                                                                          | 22,260        |

poration, Noblesville, IN). Laryngoscopy was performed using a fiberoptic DL handle and blade (Heine Inc., Dover, NH). DI was defined as grade III or IV DL view or more than three attempts at intubation by a staff anesthesiologist. Impossible intubation was defined as the inability to intubate the patient using DL technique despite more than three attempts.

Based on the work by Langeron *et al.*<sup>4</sup> and Han *et al.*<sup>5</sup>, we estimated that we would need to observe approximately 20,000 cases of MV to record 1,000 cases of difficult ventilation and 20 cases of impossible ventilation. We initially set our sample size and study duration to attain these sample sizes.

### Statistical Analysis

Univariate analysis was performed between patients with or without the following measured outcomes: grade 3 MV, grade 4 MV, and grade 3 or 4 MV and DI. Statistical significance was tested using Pearson chi-square or Fisher exact test. A *P* value less than 0.05 was considered significant. All variables found to be significant in the univariate analysis were entered into a multivariate logistic regression model to identify independent predictors of the measured outcome.

If three or more risk factors were identified for an outcome, a risk factor scale was created to predict the outcome. Receiver operating characteristic curves and odds ratios were analyzed to assess the diagnostic value of the risk factor scale.

## Results

Of 61,252 anesthetic cases performed in adult patients during a 24-month period, 22,660 cases included an attempt at MV. Thirty-seven cases (0.16%) of grade 4 MV (impossible to ventilate) and 313 cases (1.4%) of grade 3 MV (difficult to ventilate) were recorded (table 3). Two cases of IMV were due to an existing patent tracheotomy site and were excluded from these data. No other patient exclusions were performed. Eighty-four cases (0.37%) of grade 3 or 4 MV and DI were observed.

During the first 9 months of the study period, the mandibular protrusion test was not recorded in the preoperative anesthesia history and physical form. Therefore, only 14,369 cases were included in the univariate and multivariate predictor analysis. All episodes of grade 3 or 4 MV were included in the analysis.

Univariate analysis demonstrated several risk factors associated with grade 3 MV, grade 4 MV, and grade 3 or 4 MV with DI (table 4). Body mass index (BMI) of 30 kg/m<sup>2</sup> or greater and age of 57 yr or older maximized the sum of sensitivity and specificity for each risk factor. Multivariate regression analysis identified the following independent predictors of grade 3 MV: BMI of 30 kg/m<sup>2</sup> or greater, presence of a beard, Mallampati classification III or IV, age of 57 yr or older, severely limited mandibular protrusion, and a history of snoring (table 5). These six indicators were used to create a prediction score. A patient was given

one point if a preoperative predictor was noted. The area under the curve for the receiver operating characteristic curve was 0.75 (fig. 1). Weighting the factors did not improve the curve.

Multivariate regression identified history of snoring ( $P = 0.004$ ) and thyromental distance of less than 6 cm ( $P = 0.040$ ) as independent predictors of grade 4 MV.

Multivariate regression analysis identified the following independent predictors of grade 3 or 4 MV combined with DI: limited or severely limited mandibular protrusion, thick/obese neck anatomy, history of sleep apnea, history of snoring, and BMI of 30 kg/m<sup>2</sup> or greater (table 5). The receiver operating characteristic curve demonstrated an area under the curve of 0.78 (fig. 2).

Of the 37 cases of grade 4 MV, only 1 patient could not be intubated and required emergent cricothyrotomy. Ten patients had a DI, and 26 were intubated without difficulty.

**Table 4. Univariate Predictors of Airway Outcomes**

|                                        | Grade 3 Mask Ventilation |                |         | Grade 4 Mask Ventilation |               |         | Grade 3 or 4 Mask Ventilation and Difficult Intubation |               |         |
|----------------------------------------|--------------------------|----------------|---------|--------------------------|---------------|---------|--------------------------------------------------------|---------------|---------|
|                                        | No (n = 14,057)*         | Yes (n = 313)* | P Value | No (n = 14,332)*         | Yes (n = 37)* | P Value | No (n = 14,285)*                                       | Yes (n = 84)* | P Value |
| Mallampati III or IV                   | 1,188 (8.6)              | 70 (23)        | < 0.001 | 1,252 (8.9)              | 6 (17)        | NS      | 1,221 (8.7)                                            | 37 (45.7)     | < 0.001 |
| Abnormal cervical spine†               | 1,108 (8)                | 37 (14)        | 0.001   | 1,139 (8.1)              | 6 (20)        | 0.013   | 1,160 (8.1)                                            | 15 (20.3)     | < 0.001 |
| Thick/obese neck anatomy               | 1,397 (10)               | 95 (34)        | < 0.001 | 1,477 (11)               | 15 (48)       | < 0.001 | 1,455 (11)                                             | 37 (49)       | < 0.001 |
| Abnormal neck anatomy‡                 | 153 (1.2)                | 4 (2.2)        | NS      | 154 (1.2)                | 3 (16)        | 0.002   | 155 (1.2)                                              | 2 (4.9)       | NS      |
| Edentulous dentition                   | 522 (4.4)                | 25 (15)        | < 0.001 | 544 (4.5)                | 3 (13)        | NS      | 545 (4.5)                                              | 2 (4.3)       | NS      |
| Thyromental distance < 6 cm            | 901 (6.5)                | 30 (11)        | 0.007   | 926 (6.6)                | 5 (16)        | 0.039   | 913 (6.5)                                              | 18 (23.4)     | < 0.001 |
| Mouth opening < 3 cm                   | 553 (4)                  | 20 (6.8)       | 0.016   | 571 (4.1)                | 2 (6.3)       | NS      | 564 (4)                                                | 9 (11.5)      | 0.001   |
| Limited MPT                            | 1,333 (9.8)              | 24 (15)        | 0.042   | 1,355 (9.8)              | 2 (9.1)       | NS      | 1,348 (9.8)                                            | 9 (22.5)      | < 0.001 |
| Beard                                  | 1,371 (9.9)              | 62 (20)        | < 0.001 | 1,427 (10)               | 6 (17)        | NS      | 1,421 (10)                                             | 12 (15)       | NS      |
| Cough                                  | 380 (2.7)                | 20 (6.5)       | < 0.001 | 399 (2.8)                | 1 (2.7)       | NS      | 397 (2.8)                                              | 3 (3.6)       | NS      |
| Rhinorrhea                             | 65 (0.5)                 | 2 (0.6)        | NS      | 67 (0.5)                 | 0 (0)         | NS      | 67 (0.5)                                               | 0 (0)         | NS      |
| COPD                                   | 792 (5.7)                | 28 (9.1)       | 0.011   | 818 (5.8)                | 2 (5.4)       | NS      | 816 (5.8)                                              | 4 (4.8)       | NS      |
| Asthma                                 | 1,133 (8.2)              | 27 (8.9)       | NS      | 1,158 (8.2)              | 2 (5.9)       | NS      | 1,149 (8.2)                                            | 11 (14)       | NS      |
| Snoring                                | 3,505 (27)               | 83 (50)        | < 0.001 | 3,576 (27)               | 12 (57)       | 0.002   | 3,560 (27)                                             | 28 (67)       | < 0.001 |
| Sleep apnea                            | 651 (4.7)                | 49 (16)        | < 0.001 | 693 (4.9)                | 7 (19)        | < 0.001 | 682 (4.8)                                              | 18 (22)       | < 0.001 |
| Body mass index ≥ 25 kg/m <sup>2</sup> | 8,843 (64)               | 270 (90)       | < 0.001 | 9,083 (64)               | 30 (81)       | 0.033   | 9,039 (64)                                             | 74 (91)       | < 0.001 |
| Age ≥ 55 yr                            | 5,952 (42)               | 171 (55)       | < 0.001 | 6,107 (43)               | 16 (43)       | NS      | 6,090 (43)                                             | 43 (51)       | NS      |
| Emergent operation                     | 384 (2.7)                | 15 (4.3)       | NS      | 397 (2.8)                | 2 (5.6)       | NS      | 593 (2.8)                                              | 6 (7.1)       | 0.015   |
| Resident anesthetist§                  | 8,581 (62)               | 266 (85)       | < 0.001 | 8,823 (62)               | 24 (65)       | NS      | 8,785 (62)                                             | 62 (74)       | 0.029   |

Data are n (%).

\* Cases with missing data for the specific predictor are excluded from percentage calculation. † Defined as limited extension, limited flexion, known unstable, possible unstable. ‡ Defined as limited laryngeal mobility, radiation changes, thyroid cartilage not visible, tracheal deviation. § A comparison of the anesthesia resident patient population group with the certified registered nurse anesthetist/fellow patient population group demonstrated a highly statistically significant difference in risk factors for difficult mask ventilation. Given this difference in acuity, anesthesia performed by resident was removed from the multivariate regression analysis despite being significant in the univariate analysis.

COPD = chronic obstructive pulmonary disease; MPT = mandibular protrusion test; NS = not significant.

**Table 5. Airway Outcome Independent Predictors**

| Factor                                                 | P Value  |
|--------------------------------------------------------|----------|
| Grade 3 mask ventilation                               |          |
| Body mass index $\geq 30$ kg/m <sup>2</sup>            | < 0.0001 |
| Beard                                                  | < 0.0001 |
| Mallampati III or IV                                   | < 0.0001 |
| Age $\geq 57$ yr                                       | 0.002    |
| Jaw protrusion—severely limited                        | 0.018    |
| Snoring                                                | 0.019    |
| Grade 3 or 4 mask ventilation and difficult intubation |          |
| Jaw protrusion—limited or severely limited             | < 0.0001 |
| Thick/obese neck anatomy                               | 0.019    |
| Sleep apnea                                            | 0.036    |
| Snoring                                                | 0.049    |
| Body mass index $\geq 30$ kg/m <sup>2</sup>            | 0.053    |

## Discussion

The results of this study confirm the incidence of grade 3 MV (1.4%) to be similar to the 1.6% incidence reported in the review of Han *et al.*<sup>5</sup> of 1,405 patients using the same MV scale. This is less than the 5% DMV incidence reported in the study of Langeron *et al.*<sup>4</sup> using a different MV scale. Grade 4 MV (IMV) has an incidence of 0.16% in the studied tertiary care center surgical patient population. Abnormalities in the mandibular protrusion test may be associated with grade 3 MV. Although grade 4 MV is associated with DI, an overwhelming majority of patients can still be intubated.

Langeron *et al.*<sup>4</sup> reported the incidence and predictors of DMV in a study of 1,502 adult patients designed

explicitly for this endpoint. The 1.4% observed incidence of grade 3 MV in our population was markedly lower than that reported by Langeron *et al.*<sup>4</sup> (5%) but similar to that reported by Han *et al.*<sup>5</sup> (1.5%), Asai *et al.*<sup>10</sup> (1.4%), and Rose and Cohen<sup>11</sup> (0.9%). This is most likely due to the different definitions of DMV. Historically, only three categories of MV have been used (easy, difficult, and impossible).<sup>1,4,12</sup> Of note, our inclusion of a grade 2 definition (ventilated by mask with oral airway/adjutant with or without muscle relaxant) is applicable to attempts that are neither easy nor difficult. This may be the most important explanation for why our incidence of grade 3 MV was lower than Langeron's incidence of DMV. Our study participants were able to describe an airway that was not "easy" but nevertheless presented some challenges. Clinically, neither grade 1 nor grade 2 MV raises significant clinical concern for the experienced anesthetist. This is similar to the four-point scales used to describe DL view (Cormack and Lehane) and oropharyngeal anatomy (Mallampati examination as modified by Samsoun and Young).<sup>7,9</sup> The American Society of Anesthesiologists Task Force on Management of the Difficult Airway succinctly defined DI as intubation requiring "multiple attempts,"<sup>1</sup> whereas the definition of DMV was a list of signs and symptoms ranging from objective monitoring abnormalities to subjective assessments of adequacy of air movement.<sup>1</sup> Although Han's MV scale is also limited by definitions including multiple signs and symptoms, the four-point scale may be superior at discriminating clinically significant MV challenges. Although other small studies have identified similar DMV rates, Langeron's three categories and 5% DMV inci-

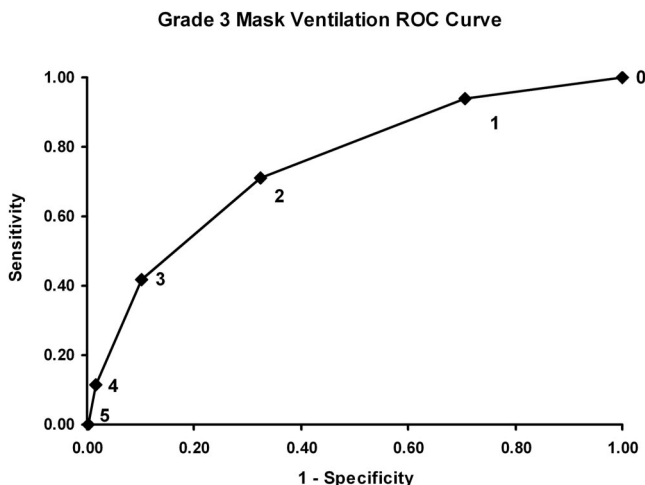

**Fig. 1.** A receiver operating characteristic (ROC) curve evaluating the sensitivity and specificity of risk factors for grade 3 (difficult) mask ventilation. Six independent predictors for difficult mask ventilation were observed: body mass index of 30 kg/m<sup>2</sup> or greater, presence of a beard, Mallampati classification III or IV, age of 57 yr or older, severely limited mandibular protrusion, and a history of snoring. A prediction score for difficult mask ventilation was based on how many of these risk factors a patient possessed. The ROC curve assists practitioners in evaluating the value of a test and in establishing an appropriate cutoff for tests that possess a range of scores. The area under the curve for the difficult mask ventilation ROC curve was 0.75.

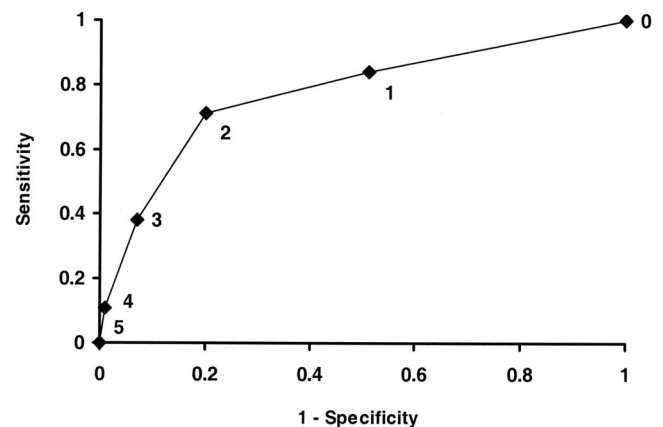

**Fig. 2.** A receiver operating characteristic (ROC) curve evaluating the sensitivity and specificity of risk factors for grade 3 (difficult) or 4 (impossible) mask ventilation and difficult intubation (grade III or IV direct laryngoscopy view or 4+ intubation attempts by staff). Five independent predictors were observed: limited or severely limited mandibular protrusion, thick/obese neck anatomy, a history of sleep apnea, a history of snoring, and body mass index of 30 kg/m<sup>2</sup> or greater. A prediction score for difficult mask ventilation and intubation was based on how many of these risk factors a patient possessed. The area under the curve for the difficult mask ventilation ROC curve was 0.78.

dence may overstate the incidence of clinically significant DMV.<sup>12,13</sup>

We were able to confirm Langeron's observation that increased BMI, presence of a beard, history of snoring, and advanced age are independent predictors of grade 3 MV. Our observations indicated an optimal sensitivity and specificity at a BMI of 30 rather than 26 kg/m<sup>2</sup> as previously reported.<sup>4</sup> Although significantly increased BMI has been found to be a risk factor for DI,<sup>14</sup> these data demonstrate that even moderately increased BMI is the most important risk factor for grade 3 MV. We have confirmed presence of a beard as an important risk factor for grade 3 MV. Poor mask fit and gas leak are the intuitive anatomical pathology relating presence of a beard and grade 3 MV.<sup>15</sup> A beard is the only easily modifiable risk factor for DMV. Now that it has been confirmed that a beard is a significant risk factor, we are obligated to inform patients of this risk. We may need to recommend that they shave their beard before the procedure, especially in patients with other risk factors for DMV. Further investigation in this area is necessary.

We were able to confirm that a history of snoring is associated with grade 3 MV as reported previously by Langeron *et al.*<sup>4</sup> and Yildiz *et al.*<sup>12</sup> Snoring has been shown to be related to upper airway collapse.<sup>16</sup> A history of obstructive sleep apnea requiring surgical or positive airway pressure treatment was not found to be related to grade 3 MV. Given the high prevalence of snoring, we had hoped to find a more specific historical or physical examination element that may provide improved positive predictive value.<sup>17</sup> In contrast to Langeron's findings, we were unable to identify lack of teeth as an independent predictor of grade 3 MV. Although age of 57 yr or older may seem to be the independent predictor responsible for eliminating edentulous dentition from the multivariate model, interaction analysis did not support this theory. This deviation from the results of Langeron *et al.* warrants further study.

Our data do identify a possible relation between abnormalities in the mandibular protrusion test and grade 3 MV. The jaw-thrust maneuver as a tool in restoring patency of the upper airway is a mainstay of anesthetic practice and has been described for more than 100 yr.<sup>18</sup> Although evaluation of the mandibular protrusion test is a part of the American Society of Anesthesiologists Task Force on Management of the Difficult Airway's standard physical examination,<sup>1</sup> many institutions, including ours, have not historically performed the test, been aware of its significance, or documented its findings.<sup>19</sup> Calder *et al.*<sup>6</sup> and Takenaka *et al.*<sup>20</sup> indicated the need to further study the value of this quick and simple test. The inability to protrude the mandible, particularly in patients with characteristics predisposing them to upper airway collapse, may be an important risk factor. Our data do indicate a role for this test as part of the standard airway

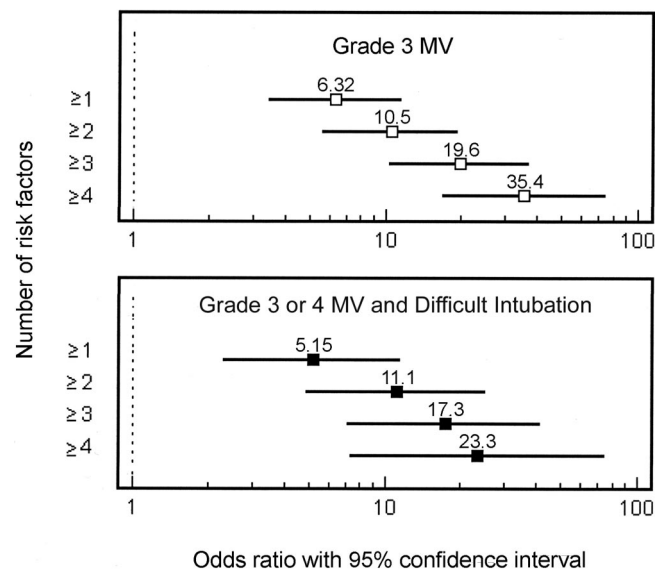

Fig. 3. The risk of grade 3 MV (*top, open boxes*) or grade 3/4 MV and difficult intubation (*below, closed boxes*) based on the number of patient risk factors. The odds ratio compares patient cohorts with a given risk level (*i.e.*,  $\geq 1$ ,  $\geq 2$ , *etc.*) to a patient with 0 risk factors. The x-axis demonstrates the odds ratio and 95% confidence interval using a log 10 scale.

examination and its inclusion as a risk factor for grade 3 MV.

Patients with three or more points in the predictor scale had a grade 3 MV incidence of 5%, nearly 20 times the baseline incidence of 0.26% for patients with zero points (fig. 3). Some providers may wish to use a risk factor cutoff of three to guide their MV preparation. Given the morbidity associated with airway difficulty, our predictive factor system may serve to help the practitioner prepare for a possible episode of grade 3 MV by having the patient shave his beard, ensuring the presence of another anesthesia provider in the room, or preparation for alternate methods of MV.<sup>1</sup>

The study of IMV has been limited to anecdotal reports of its occurrence.<sup>21,22</sup> No previous study has been able to comment on its incidence or predictors.<sup>13</sup> Our series of 37 patients demonstrates the largest group of IMV patients reported thus far and may offer some insight. The incidence of grade 4 MV is rare at 0.16%, but still more frequent than other dreaded anesthesia complications such as malignant hyperthermia or homozygous atypical pseudocholinesterase.<sup>23,24</sup> Given that MV is an important rescue technique in cases of DI, the inability to mask ventilate represents an event with significant potential morbidity and mortality.<sup>13</sup> We were only able to identify two predictors of grade 4 MV: a history of snoring and thyromental distance of less than 6 cm. This is almost certainly due to limited statistical power given the relatively small number of cases available for study, masking true relations. However, it may actually reveal an underlying variation in etiology between grade 3 MV and grade 4 MV.

**Table 6. Grade 3 or 4 Mask Ventilation Risk Factors among Standard versus Awake Fiberoptic Intubation Attempts**

| Grade 3 or 4 MV Risk Factors | Awake Fiberoptic Intubation (n = 586) | Standard Induction (n = 13,668) |
|------------------------------|---------------------------------------|---------------------------------|
| ≥1                           | 460 (78)                              | 9,644 (71)                      |
| ≥2                           | 252 (43)                              | 4,471 (33)                      |
| ≥3                           | 97 (17)                               | 1,431 (10)                      |
| ≥4                           | 24 (4.1)                              | 222 (1.6)                       |
| ≥5                           | 2 (0.3)                               | 17 (0.1)                        |

Data are n (%).

MV = mask ventilation.

The most important result from our series of 37 grade 4 MV patients is the fact that only 1 patient required surgical airway access. Given the overlap of conditions that predispose to grade 3 MV and DI, a valid *a priori* concern would be that IMV cases may have a high incidence of impossible intubation *via* DL. Although a disproportionate share of these patients had poor views on DL, they were successfully intubated. Unfortunately, provider preoperative concern for DI may be markedly skewing our results. Out of concern for impossible ventilation and intubation, the anesthesia provider may have chosen elective awake fiberoptic intubations and thereby excluded these patients from our data set. Table 6 does demonstrate that patients undergoing elective awake fiberoptic intubation had much higher rates of the risk factors for grade 3 MV than the general population studied ( $P < 0.01$ ). Clearly, despite our large overall sample size, we were unable to detect a large number of IMV cases and struggle to provide conclusions regarding IMV risk factors. Further studies assessing incidence, predictors, and impact of IMV are essential.

Analysis of patients with grade 3 or 4 MV and DI represents a fruitful and important effort because of the frequency observed in our population (0.37%) and a large enough series to provide meaningful data (84 cases). Limited or severely limited mandibular protrusion, thick/obese neck anatomy, a history of sleep apnea, a history of snoring, and BMI of 30 kg/m<sup>2</sup> or greater were identified as independent predictors. This clinical situation represents among the most feared airway outcomes: a patient in whom establishing endotracheal ventilation is difficult and the primary rescue technique, MV, is also challenging. The ability to predict this situation would offer the clinician the ability to prepare for it with alternative airway tools before engaging in anesthesia induction: laryngeal mask airway, fiberoptic intubation cart, Bullard laryngoscope, and so forth. Intuitively, the presence of a beard should not be a shared anatomical abnormality for both grade 3 MV and DI, and the data are consistent with this hypothesis. The mandibular protrusion test was the most important predictor for this outcome. This supports the theory that defects in mandib-

ular protrusion may be a shared abnormality between DI and DMV as suggested by Takenaka *et al.*<sup>20</sup>

There are several limitations to our conclusions. To garner a large enough sample size, we could not introduce a data collection process or care protocol that interfered with delivery of clinical care. Despite general standardization of MV and intubation technique at our institution, we cannot guarantee that controlled and uniform conditions were applied across all the MV attempts. In addition, both the possible predictors and outcomes were recorded by providers as part of their clinical documentation responsibilities. Although the format and specificity of some elements were prospectively altered to provide more detailed data for analysis, we did not use a distinct data collection form with diagrams and extensive definitions to assist providers in accurate selection as recommended in other studies.<sup>25</sup> A more consistent reported incidence of grade 3 MV is a first step to predicting its occurrence. To that end, we recommend the validation of an MV scale as described by Han *et al.*<sup>5</sup> Our definition was more stringent than that used by Langeron and may be underestimating the incidence of clinically significant grade 3 MV as a result. Our analysis of grade 4 MV is limited by the rarity of the event more so than ambiguity in its definition. Despite reviewing more than 20,000 cases, we were able to identify only 37 occurrences and were unable to derive reliable predictors of the event. Multicenter trials combining patient populations or detailed retrospective studies of patients exhibiting IMV may be warranted.

In conclusion, we have been able to demonstrate the value of the mandibular protrusion test in predicting DMV and DMV combined with DI. We have provided confirmation of previous studies indicating the predictive value of advanced age, increased BMI, presence of a beard, and a history of snoring. Furthermore, we have been able to comment on the incidence and predictors of two more rare yet clinical worrisome situations: IMV and DMV combined with DI. We hope our data can serve to help anesthesia providers prepare for possible DMV with greater accuracy.

## References

1. Practice guidelines for management of the difficult airway: An updated report by the American Society of Anesthesiologists Task Force on Management of the Difficult Airway. *ANESTHESIOLOGY* 2003; 98:1269-77
2. Shiga T, Wajima Z, Inoue T, Sakamoto A: Predicting difficult intubation in apparently normal patients: A meta-analysis of bedside screening test performance. *ANESTHESIOLOGY* 2005; 103:429-37
3. Adnet F: Difficult mask ventilation: An underestimated aspect of the problem of the difficult airway? *ANESTHESIOLOGY* 2000; 92:1217-8
4. Langeron O, Masso E, Huraux C, Guggiari M, Bianchi A, Coriat P, Riou B: Prediction of difficult mask ventilation. *ANESTHESIOLOGY* 2000; 92:1229-36
5. Han R, Tremper KK, Kheterpal S, O'Reilly M: Grading scale for mask ventilation. *ANESTHESIOLOGY* 2004; 101:267
6. Calder I, Calder J, Crockard HA: Difficult direct laryngoscopy in patients with cervical spine disease. *Anaesthesia* 1995; 50: 756-63
7. Samsom GL, Young JR: Difficult tracheal intubation: A retrospective study. *Anaesthesia* 1987; 42:487-90

8. Goodwin MW, Pandit JJ, Hames K, Popat M, Yentis SM: The effect of neuromuscular blockade on the efficiency of mask ventilation of the lungs. *Anaesthesia* 2003; 58:60-3
9. Cormack RS, Lehane J: Difficult tracheal intubation in obstetrics. *Anaesthesia* 1984; 39:1105-11
10. Asai T, Koga K, Vaughan RS: Respiratory complications associated with tracheal intubation and extubation. *Br J Anaesth* 1998; 80:767-75
11. Rose DK, Cohen MM: The airway: Problems and predictions in 18,500 patients. *Can J Anaesth* 1994; 41:372-83
12. Yildiz TS, Solak M, Toker K: The incidence and risk factors of difficult mask ventilation. *J Anesth* 2005; 19:7-11
13. Murphy M, Hung O, Launcelott G, Law JA, Morris I: Predicting the difficult laryngoscopic intubation: Are we on the right track? *Can J Anaesth* 2005; 52:231-5
14. el-Ganzouri AR, McCarthy RJ, Tuman KJ, Tanck EN, Ivankovich AD: Pre-operative airway assessment: Predictive value of a multivariate risk index. *Anesth Analg* 1996; 82:1197-204
15. Garewal DS, Johnson JO: Difficult mask ventilation. *ANESTHESIOLOGY* 2000; 92:1199-200
16. Akan H, Aksoz T, Belet U, Sesen T: Dynamic upper airway soft-tissue and caliber changes in healthy subjects and snoring patients. *Am J Neuroradiol* 2004; 25:1846-50
17. Chou HC, Wu TL: Large hypopharyngeal tongue: A shared anatomic abnormality for difficult mask ventilation, difficult intubation, and obstructive sleep apnea? *ANESTHESIOLOGY* 2001; 94:936-7
18. Defalque RJ, Wright AJ: Who invented the "jaw thrust"? *ANESTHESIOLOGY* 2003; 99:1463-4
19. Mellado PF, Thunborg LP, Swiatek F, Kristensen MS: Anaesthesiological airway management in Denmark: Assessment, equipment and documentation. *Acta Anaesthesiol Scand* 2004; 48:350-4
20. Takenaka I, Aoyama K, Kadoya T: Mandibular protrusion test for prediction of difficult mask ventilation. *ANESTHESIOLOGY* 2001; 94:935, author reply 937
21. Parmet JL, Colonna-Romano P, Horrow JC, Miller F, Gonzales J, Rosenberg H: The laryngeal mask airway reliably provides rescue ventilation in cases of unanticipated difficult tracheal intubation along with difficult mask ventilation. *Anesth Analg* 1998; 87:661-5
22. Peterson GN, Domino KB, Caplan RA, Posner KL, Lee LA, Cheney FW: Management of the difficult airway: A closed claims analysis. *ANESTHESIOLOGY* 2005; 103:33-9
23. Jensen FS, Viby-Mogensen J: Plasma cholinesterase and abnormal reaction to succinylcholine: Twenty years' experience with the Danish Cholinesterase Research Unit. *Acta Anaesthesiol Scand* 1995; 39:150-6
24. Ording H: Investigation of malignant hyperthermia susceptibility in Denmark. *Dan Med Bull* 1996; 43:111-25
25. Rosenstock C, Gillesberg I, Gatke MR, Levin D, Kristensen MS, Rasmussen LS: Inter-observer agreement of tests used for prediction of difficult laryngoscopy/tracheal intubation. *Acta Anaesthesiol Scand* 2005; 49:1057-62
